# Supplementary material for: Characterization and target genes of nine human PRD-like homeobox domain genes expressed exclusively in early embryos
Source: PubMed Central journal article supplement (PMC4944136; doi:10.1038/srep28995), 2016-07-14
Supplement: srep28995-s1.pdf [file srep28995-s1.pdf]

# **Characterization and target genes of nine human PRD-like homeobox domain genes expressed exclusively in early embryos**

Elo Madisson<sup>1,¶</sup>, Eeva-Mari Jouhilahti<sup>1,¶</sup>, Liselotte Vesterlund<sup>1</sup>, Virpi Töhönen<sup>1</sup>, Kaarel Krjutškov<sup>1,2</sup>, Sophie Petropoulos<sup>3</sup>, Elisabet Einarsdottir<sup>1,4</sup>, Sten Linnarsson<sup>3</sup>, Fredrik Lanner<sup>5</sup>, Robert Månsson<sup>6</sup>, Outi Hovatta<sup>5</sup>, Thomas R. Bürklin<sup>1,8</sup>, Shintaro Katayama<sup>1,7</sup> and Juha Kere<sup>1,4\*</sup>

<sup>1</sup> Biosciences and Nutrition, Karolinska Institutet, Huddinge, Stockholm, Sweden

<sup>2</sup> Competence Centre on Health Technologies, Tartu, Estonia

<sup>3</sup> Department of Medical Biochemistry and Biophysics, Karolinska Institutet, Stockholm, Sweden

<sup>4</sup> Molecular Neurology Research Program, University of Helsinki and Folkhälsan Institute of Genetics, Helsinki, Finland

<sup>5</sup> Department of Clinical Science, Intervention and Technology (CLINTEC), Karolinska Institutet, Huddinge, Stockholm, Sweden

<sup>6</sup> Department of Laboratory Medicine, Division of Clinical Immunology, Karolinska Institutet, Huddinge, Stockholm, Sweden

<sup>7</sup> Science for Life Laboratory, Stockholm, Sweden

<sup>8</sup> Department of Biomedicine, University of Basel, Basel, Switzerland

\* Corresponding author, E-mail: [juha.kere@ki.se](mailto:juha.kere@ki.se)

¶ These authors contributed equally to this work.

## Supporting Information

### Supplemental Text S1. Predicted sequences for PRD-like gene cloning primer design

### Supplemental Text S2. UCSC genome browser tracks for novel PRD-like homeobox genes

### Supplemental Table S1. PRD-like homeobox gene expression in the FANTOM5

**comprehensive promoter database.** The number of predicted promoters, normalized tagclusters in predicted transcript or in the whole region of the gene are shown. Values near or below 1 may be considered noise, explaining the lack of predicted promoters for very low expression values. Counts of tagclusters from the FANTOM5 promoter database correlate with the expression of the genes.

**Supplemental Table S2. The up- and downregulated gene sets and corresponding TFEs and genomic annotations.** All the detected up- and downregulated target genes are shown on separate sheets for each homeodomain transcription factor. The down-regulated and up-regulated target genes are sorted according to the differential expression score from lowest to highest. TFE-s (TFE), gene names (Gene.Name), differential expression score (Score.d.), q-value (q.value...), fold change (Fold.Change), TFE genomic annotation location (annotation), and differential expression direction (regulated) are shown. The column Expressed.in.preimplantation shows whether the gene was detected (average RPKM values over oocytes, zygotes, 2-, 4-, 8-cell embryos, morulae and blastocysts > 1) or not detected (average RPKM < 1) in Yan, et al., 2013 dataset.

### Supplemental Table S3. Expression values for PRD-like homeobox genes in hESC and 8-cell blastomeres

### Supplemental Table S4. Primers used for PCR

### Supplemental Table S5. Cloning primers for FastBac vector constructs

**Supplemental Figure S1. UCSC genome browser image showing gene structure, TFE peaks and transcript prediction.** UCSC genome browser view of validated PRD-like transcripts. Primer locations in relation to the previously predicted gene sequences and our validated transcripts are shown. Expression in three different stages of human pre-implantation development, 8-cell, 4-cell and oocyte are visualized below each transcript.

### Supplemental Figure S2. NOBOX structure and novel TSS

**Supplemental Figure S3. Visualization of *CPHX1-DUXB-CPHX2* cluster at chr16:75,693,001-75,761,000 where all three genes are transcribed from the reverse strand.**

**Supplemental Figure S4. Similarities in protein sequence inside and outside of the homeodomain.** Alignment of a) CPHX1 and CPHX2 and b) TPRX1 and TPRX2 shows protein sequence similarities outside of the highly conserved homeodomain.

**Supplemental Figure S5. Chromosome ideogram visualizing the genomic locations of the PRD-like homeobox genes.** The clustering of DUXA, DPRX, TPRX2 and TPRX1 on chromosome 19 is shown, with the position of CRX given as well. There is a second cluster of genes on chromosome 16, namely CPHX1, DUXB and CPHX2, whereas TPRXL, ARGFX, NOBOX and OTX2 are located outside of these 2 clusters on chromosome 3, 7 and 14 respectively.

**Supplemental Figure S6. Expression of homeobox genes in hESCs and 8-cell embryo.** PCR was performed on three different hESC lines Hs401, H9, HS980 and 8-cell blastomeres. Expression values were obtained by normalizing to GAPDH expression by the formula  $y = (Ct(GAPDH) -$

Ct(gene)) + 25. The average of three replicas is shown with standard deviation represented by error bars. A Ct value of 40 was used for not detected samples.

**Supplemental Figure S7. The methylation patterns of the PRD-like homeobox genes in human sperm, preimplantation embryo, ESC and embryonic tissue cells.** The 100 bp methylation value percentages were plotted for sites within 500 bp up- and downstream of the TFE for the specific homeobox gene. Only sites with at least 5 x coverage were used. Circles indicate each data-point and nothing is plotted when data is missing. Color of the boxplot indicates sample groups: red – sperm; green – 8-cell preimplantation embryo (8-cell); dark blue – inner cell mass of the preimplantation embryo (ICM); light blue – trophectoderm of the preimplantation embryo (TE); purple – blastocyst of the preimplantation embryo (Blast, BlastSingle); yellow – embryonic stem cells; grey – fetal heart and lung tissues.

**Supplemental Figure S8. The methylation patterns of the PRD-like homeobox genes in blood cells.** The M-values for CpG sites surrounding the homeobox genes ARGFX, DPRX, DUXA, NOBOX and the control gene OTX2 are shown for human blood cells from Infinium Human Methylation 450K bead chip array. The values below 0 indicate hypomethylation, the values above 0 indicate hypomethylation. Values are indicated by physical distance from the TSS of every gene for up to 1500 bp upstream (TSS1500) throughout the 5' UTR, 1-st Exon, Gene Body and 3'UTR.

**Supplemental Figure S9. The pFastBac vector construct is functional in hESCs.** mCherry red fluorescent protein was cloned into the pFastBac vector in the same manner as the homeobox genes. Both the microscopy images with bright field in top panel, followed by mCherry and eGFP channels (a) and FACS analysis (b) show simultaneous expression of both eGFP and mCherry proteins in the same cell (boxed). Multiple sequence reads from GFP positive samples align to the overexpression vector pFastBac backbone sequence while almost no reads align to the backbone from the GFP negative samples in library 4 (c).

**Supplemental Figure S10. Expression of up-regulated gene sets in embryos.** Gene expression values for up-regulated target genes by three activators (*CPHX1*, *CPHX2* and *ARGFX*) were studied in human embryo development time-course by Yan, et al, 2013. Average log(RPKM) values for all the up-regulated target gene sets in different biological samples are shown as line-plots for *ARGFX* (red), *CPHX1* (green) and *CPHX2* (blue). Error bars show standard error of the target genes.

**Supplemental Figure S11. PRD-like homeodomain transcription factors have common target genes.** Similarity of the homeobox target genes was observed by performing a chi-squared test of all pairwise comparisons for both up- and downregulated genes. The number of intersecting genes is shown, as well as a multiple testing corrected p-value associated with the chi-squared test.  $p < 10^{-2*}$ ,  $p < 5 \times 10^{-5**}$ ,  $p < 5 \times 10^{-8***}$ .

**Supplemental Figure S12. Hierarchical clustering and outlier detection.** Hierarchical clustering reveals outliers in library 3 (a): C5 and E8. There are no evident outliers in library 4 (b).

## Supplementary text 1

### Predicted sequences for PRD-like gene cloning primer design

Coordinates refer to Genome assembly GRCh37/hg19

Forward primers were designed within predicted the 5' UTRs, and reverse primer within the predicted 3'UTRs.

Coordinates for predicted 5'UTRs for genes with previous RefSeq predictions:

**DUXA** (FE262918 chr19:57678787-57678897 -)

**DPRX** (FE273734 chr19:54135194-54135433 +)

**ARGFX** (FE367949 chr3:121286750-121286860 +)

**TPRX1** (undefined chr19:48,307,772-48,307,835 -), led amplification of **TPRX1** and **TPRX2**

Predicted sequences for PRD-like genes without previous RefSeq predictions:

**DUXB** (FE200082 chr16:75735289-75735420 -)

>FE200082.Duxb.5'UTR, 41 bp

TTACTCGCTGATCTCCGTGGAGTCCAGGTCTTCTGCCCAAG

>FE200082. Duxb.CDS, 1038 bp

ATGAATTTGGAGGGCACTTCAGGTGGCATACTTCAAAAAGAATTCTGGAGAAACAGAA  
TTCAGTATAACCAGAGTCAAAGGATATCCTCCAATCATGGTTTCAACATGACCCTTTC  
CCTGATAAAGCTGCCAGAGAACAACCTGGCCAAAGAAATTGGGGTTCCAGAATCTAATA  
TTCAGGTTTGGTTTAAAAATTACAGAGTAAAACAGAGAAAACCTGGATTATAAGTGCTT  
CTCAGAAAAAGATCAAACCCAGGGGCATGACCAGTCCCAGCATCTGACTCAAGAATAC  
TTACCTAAAGAAGCCCGACAAAAACAGACATTCATCACATGGACTCAAAAAAACAGG  
CTAGTGCAAGCCTTTGAGAGGAACCCATTCCCTGATATTGCTACCAGAAAAAACTGG  
CTGAACAAACAGGCCTGCAGGAATCAAGAATTCAAATGTGGTTTCAGAAACAAAGATC  
TCTGTACCTCAAGAAGAGCAGAATGGAGCCCATGAATTTATTGGTAGACGACCCAAAT  
GAGAGACCAGATGCAACTGTTGGGTGGCATCCAATCAACCTGTTCCCTCCCCACAGACA  
GCTCTCATTATTTTTCTTGCTCACATTCTTCCAGCGGGCATGAACTCTTCCACCTGTTC  
TTCCTTCAACCCAGGCTCCTTGGGATCCCTTCAGGTTCCATGTGAGCCAAGGACCAAAT  
GTCATGATCATGCAGCCCACACAGGCTGTGCAGGAAGGAGAGAAGTCTGATCAGCCTC  
TGATAATTCCGAATCACCTCCTGACACTGCCAATTCTGACAAAGGACTTAGATACTCCG  
ACTCCCTTCTGGCTCCAATACCAAGAAGAACACCAAAAATCACAAAGAACACTCTGGCT  
CGGGAGTACCACAGGTCAAGAGCCATTCTCAGCCTGAACCTGAGCACAGGGAGCAAC  
AACCTCTAAATCTGGGTGAGTTTGCATATCGAACATTTTGCAAAGGTGGGACGAGAT  
CTGCCAGGCTCTGCTTGCTGAATGGGACCCTCTCAAAGGGACACACTGA

>FE200082. Duxb.3'UTR, 1177bp

GACAGACTTGTGGCAGCAGTAGGCACACTCAGCTGAGAAACATGTCATCCACTTGGCT  
AATTGTCCAGCAATATGTGGAAACCTCAAGCCTTTAGGTCAACTCCTGTAATGCAGA  
GTTCTCCAGTAAAAGGTACAACCTTggccgggagcagtggtcagcctataatcccagcactttgggagggccaagggc  
ggcagatcacgaggtcaggagtttgagaccagcctggccaacatggtgaaacctgcctctactaaaatacaaaaattggctgggcgtggtg

gcgcgcgcctgtagtcaccagctaccaggaggctaaggcacgagaatcgcttgaacctgggagggcggaggttagcagtgagccgagatcac  
gccactgcactccacctggtgacagagtgagactccgtctcaaaaaataaataaaaTAAGTACAACCTTGGCAATTC  
tgacatatagaaattggaagtgaggtatggatggctggattggttacagcttgggtatgccttattgaacagagttgaacactcagcagtgatg  
agtggttgaagtatggccactggaattgtccaagacttagctactgttacatatacataactaagttaggtttcaattttgtctattaagctaggta  
cagttcatccacaagtactcaaatatagaagtacagagtccttctcaggccacatttactttgctttcacatgggtagcatccgagatagagtatt  
tagcctccacaGGATGTATGTGGGGTTACTTTGGTACAATAAAAATATCTTTGAAAAATAttctt  
tttttttttgagacggagtctcgtctatcggccaggctggagtgcgatggtgcaatctcggctcactgcaacctcgcctcccggattcaagcga  
ttctcctgcctcagcctcctgagttactgggattatagcgtgtgccaccatgcctggctaattttgtatttttagtagagacggggttcaccatgtt  
ggtcaggctggtctcaaacctcctgacctatgatccgccatctcagcctcccaaagtctgggattacaggtgtaagccaccatgccagccT  
TGAAAAATATTACTTGTATCTTATCCTTTTGAATTCTGTTCCATTATACAATACTTTC  
AA

NOTE: DUXB 3'-UTR contains Alu and ERV (small letters), which was masked for the design

**CPHX1** (FE200101 chr16:75760315-75760435,-)

>FE200101.Cphx1.5'UTR, 60 bp

GTTGCTTGCTGATCTCAGTTGCTTGGTCTCCGTGAAGTCCAGGTCTTCTACCCCAA  
G

>FE200101.Cphx1.CDS, 1218 bp

ATGAATTTGGACGGCACTTCAGGTGGTTCCTCCAGCTGAAGAGGATCATCATAATGAAG  
AAAGACAAACAAAGAATAAAAAGAAAAACAAAACACCGACATAAATTTTCTGAAGAAT  
TACTGCAGGAACTTAAGGAAATATTTGGAGAGAACTGTTATCCCGATTACACAACACTAG  
GAAAACACTGGCCATCAAATTTGATTGTCCGGTAAATGTGATAGATAATTGGTTCCAG  
AATAAAAGAGCCAGACTTCCACCTGCAGAAAGACGCAGAATATTTGTTCTTCAGAAAA  
AGCATGATTTTCCAGTCCAAGCCCATTCAATTTTAAAGCTGCCAGGAGACCCAGGCTGCA  
GCTCACAACACTATGCCACCAAGCAGAGCCTCTCTGGTGGCCAGAGGGCTCTGATGAGAA  
GAGCTGGTTGCTCCCATCTGGAGAAACAGTGGATTCCAGTCAAGAAATGGGCTATAA  
TTGTTTCTCTTTGGAGAACCAAGAGACTCCCAGTCAACAGGTGGGCCCCCAAGTGTCTCT  
ATCTGGAGAAACCAGGGATTCCCAGTCAACAGGTGGGTTCCCAGTGTCTCTATCTGGA  
GAAACTAGGGATTCCCAGTCAACAGGTGGCCTCCCAGAGTTCCTATCTGGTCACAGGC  
ACTGAAAAGCATCCAGGCTGTGCTATGGGGTATGGAGGTGACACAGGAAGTGGGCATT  
CTGGAAGTGGGCATTCTACTGCCTATCAATTTTCTCAGCTACAACCTCTGCAGAAATGCCTT  
CATCTCCCCCATCTTCTGTGCCATATTTTCATGGAGAAAGGACTGAAACCAAGGAAA  
GCCAGCATGCAAGTCCTTTTCTTTGGATTACGCTCAAGGTGCATATGGGGTGAAGAA  
AGACCATTGTCTTTGCTCATTCTGTCTCTCACTGCTGGGACAACAGCAGCAGAATGATT  
GGCAGTATCACCTGCAGCAGCACCAACAGCCTCAGAATTACTTAGAGGGGATGATGTT  
GCAGGAACAGCTCCCAATGGACTCGGGTCCTTGGGATCTAGGGAAGCAGTGGTCCTCG  
GCTCAGTCACAGCTGCAGAGTCAACTGCCTCAGAATAATGGAAAGCCGTTGTGCTCTC  
AACTGCAGCACATGTCTCTCAAATAGCTGCCGACTCACCCCTTCTGCCTCTGGGGCAA  
GATATGCAGGAAAGGGCTTCAGAGCAACCCAGGACCCAAATGCAGCAACTTTAA

>FE200101.Cphx1.3'UTR

GTTGAAGAGTGGACAAGGGTCTGCAGCAGGGAACCAAGGATGCAACTCTGCAAAGTA  
GTGCTAAGTGTGAGAGAAACACAGTCGCAGGTCAGGCCACAGTCACCCACACAGTAG  
ACAAGGCAGAGCCCTTACCAGAAGCCTCCACATTAAGAAAAGAAAAGAAAAGAA  
AGAAAAAAGCCAGGTGACATTGTTTGAGCCCAGGAGTTCAAGAAAAGCCTGGGCAAC  
ATGGTGAGTCCCTGTCTCTATAAAAAAACTTTTTAAAAAATTAGCTGGGCATGATGGTG  
TGCTCCTGTGGTCCCAGCTACTCAGG

**CPHX2** (FE200082 chr16:75710885-75711065,-)

> FE200082.Cphx2.5UTR, 41 bp

TTATTTTTTTCAGTTGGAAAGGCCCTGGACTGGAGTTTCGAC

> FE200082.Cphx2.CDS

ATGTCTTCCCAAGCTTTCCCAGCTGAAGAGGATCATCATAATGAAGAAAGACAAACAA  
AGAAAAAAGAAAAACAAAACACCGACATAAATTTTCTGAAGAATTATTGCAGGAAC  
TTAAGGAAATATTTGGAGAGAACGGTTATCCTGATTTCACTACTAGGAAAACACTGGC  
CAACAAATTTGATTGTCCGGTTAACGTGATAAACAACCTGGTTCCAGAACAATAGAGCC  
AGACTTCCACCGGAAGAAAGACAAAGAATATTTCTTACTTGGAAAAACACGATTTCC  
CAGTCCAAGCCTGTCCATTTTTAAGCCTCCAGGAAACCCAGGCTGCAGCTTCCAACAT  
GCCACAGAGCAGAGTTTTTCTGTGCCAAGAGGGCTCTGATGAGAAGACCTGGTTGCT  
CCCTTCTGGAGAAACAGAGGATTGCCTGTCAACAGATGGGCTACAATTGCTTCTCTTTG  
GAGAACCAAGAGACTCCCAGTCAACAGGTGGGCTCCATGTGCTCTTCTCTGGAGAAAC  
AAGGGATTCCCAGTCAACAGGTGGGTTCCCAGTGCTCCTATCTGGTTCGCAGGTACTGA  
AAAGCATCCAGGCTATGCTTTGGAGTATGGAGGTGACACAGGAAGTGAGCATTCTACT  
GCCTATCGTTTTTCTCAGCTACAACCTCTGCAGAATGCCTTCATCCTCCCCATCTTCTGTG  
CCATATTTTCATGGAGAAAGGACTGAAACCAGGGAAAGCCAGCATGCAAGTCCCTTCC  
TTTTGGATTACGCTCAAGGTGCTTACGGGGTGAAGAAAGACCATTGTCTTTGCTCATTC  
TGTCTCTCACTGCTGCAAGAACAGCAGCAGAATGATTGGCAGTATCACCCACAGCAGC  
ACCAACAGCCTCAGAATTACTCAGAGGGGATGATGTTGCAGGAACAGCTGCCAATGGA  
CTCGGGTCTTTGGGATCTAGAGAAGCAGTGGCCCTCGGCTCAGTCACAGCTGCAGAGT  
CAACTGCCTCAGAATAATGGAAAGCCGTTGTGCTCTCAACTGCAGCACGTGCCTCCCC  
AAATAGCTGCCAACTCACCCCTGCTGCCTCTGGGGCAAGATATGCAGGTAGGGGCTTC  
AAGCAACTCAGGACTCAAATGCAGCAGTTTTAGGTTGAGGGGTCTACACGGGCCTGCC  
ACAGGAACCCAAGGATGCAGCTTTGCAAAGTATTGCTAA

> FE200082.Cphx2.3UTR

GTATCACAGAACCATAGCCACAGGTCAAGCCCACAGTAACCCACACAGCAGGCCAAA  
GCAAAGCCGTCTCCAGAAGCCTCCACATAAAAAATAAAAAATAAAAAATAAGTAAATAA  
ATAAATAAAAAATAAATTTTTTTAAAAAAGCCAGATGAGGTGAGGTTGTTTGAGCCTAA  
GGGTTTCATGACGAGAGCCTGGGCAACGTGGTGAGACCCCATCTCTAAAAAATAAAAA  
AACTTTTTAAAAAATAAATTAGCTGTGTGTGATAGTGAGCTCCTGTGGTACCAGCTACTCA  
GGAAGCTGGTTCAGGAGGATCACTTGAGCCCAGGAGTTCAAGACCAGCCTGGGAAAC  
ATTTCTCAAAAAAATAAAAAAATAAAAAAATAAAAAAATAAAAAAATAAAAAAATAAAAAA

AGTCCCATTTAACTGGGAGGCTGAGATGGAAGTATCACTTGAGCCC GGGAGGTGGAGG  
CTGCAGTGAGCTGTGATGGTTCCACTATATTCCGGCCTG

**NOBOX** (FE518599 chr7:144100745-144100865, -)

> FE518599.Nobox.5'UTR

CGCGGCGGCGGGAGTCCAGGCC

> FE518599.Nobox.CDS

ATGGAACCCACAGAGAATCCCTGCCAGGGACCGCTGGATCAGCTGGAGGAGCTAGAG  
AAGATATTCCAAGAAGACCACTATCCTGACAGTGATAAACGCCGAGAGATTGCCCAGA  
CGGTGGGGGTGACCCCCCAGCGCATCATGGTAAAGGGGGCCGGCTCACTGGTGGCAGG  
GTGGAGTGGCGGAGGGGCCACCATTGAAACACTCGAATTGCAGAGTGAGCGCTCAGCG  
GTAGCCTGGGTGTGGTTCCAGAATCGCCGGGCCAAGTGGCGAAAAATGGAGAACTG  
AATGGGAAAGAAAGCAAGGACAATCCTGCAGCCCCTGGCCCTGCCAGCAGTCAATGC  
AGCTCTGCAGCTGAGATCCTACCTGCTGTGCCCATGGAGCCAAAGCCTGACCCTTTCC  
TCAGGAGTCCCCTCTGGATACCTTTCCAGAGCCCCCATGCTGCTGACTTCTGACCAGA  
CTTTGGCCCCACCCAACCCAGTGAGGGTGCTCAGAGGGTGGTGACCCCCCACTCTTC  
AGCCCCCACCTGTGCGAAGGGCCGATCTTCCTTTCCCCCTTGCCCTGTCCACACCCC  
CCAAGTATGCCACTGCTGATGGATGTTGCTGGCAGTGACAGCAGCCACAAGGACGGC  
CCCTGTGGGTCCCTGGGGGACAAGCATCACCCCTGCCACCCCCCTGTTTCATATTTGGAGGA  
GCTGGAGCCCCAGGATTACCAACAGAGCAACCAGCCAGGACCCTTCCAGTTCTCCCAG  
GCTCCACAGCCCCCGCTTTTCCAGTCCCCTCAGCCCAAGTTGCCCTACCTCCCCACTTTC  
CCCTTCTCCATGCCCAGTTCACTGACGCTTCCACCGCCCGAAGACTCTCTCTTTATGTTT  
CCCTGTGGCCCCAGCGGGGGCACATCGCAGGGCTATTGCCCAGGTGCCTCCTCAGGAC  
AGATCCTGATGCAACCACCTGCTGGGAATATAGGTACAGCCTCCTGGAGTGACCCCTG  
TTTGCCAGAGCTGCCCTTCCCTGGTCCGTTCTGCCACAAGCTCTGGGGCATCCCCCAG  
GAGGGGATGGCTACTTTCCCTGATCTATTTCCAAGTCCCTGCCCCAGGCTCTGGGCAGG  
CAGCCTTCGTCAGCTCTCTCATGGATGCCTGAAGGGGCCAGACCAGGGACTGGGCCCT  
TACTCAGCAAGGCAAAGAGGAACCACAGCTGCTTCCCTGGATCAGCCCTCAGCACT  
GGAGGAGGCCAGAGGGGATGACAAGAATAGCCATGTCCCCTAG

> FE518599.Nobox.3'UTR

TTGGGGGGTCAAAGAGTGAAAAGAGGCTGCTTGGGTGGGATAGGATTGGGCTCGCTGA  
GAGGACAGGGGTGGGGGTTGGGAAAGAGTGTGGACTCTGTAGACTGAGGGGAGAG  
TTAGACGTTTCCCCTGTGTAGGCTCGTCTTGTTGATATGAGAAGGAAGAAAGAGGGCT  
GGCGCTTCCCTTTTCTTCACTCTGTGTGGGGTCCCTGAAGGAAGCAGGTGGCCTGTG  
TTACTTCTGAATGTTGTATCAGGTGTTTTTGTGTTTCTATCCTTGCTTGACAAATGA  
GCTG

## Supplementary text 2

### UCSC genome browser tracks for novel PRD-like homeobox genes

#### ARGFX

track name="ARGFX" description="ARGFX clones and the potential ORFs in human preimplantation development" visibility=2 itemRgb="On" colorByStrand="0,128,255 255,128,0"

|      |           |           |             |      |   |                                                       |
|------|-----------|-----------|-------------|------|---|-------------------------------------------------------|
| chr3 | 121286806 | 121305447 | ARGFX_D3_01 | 1000 | + |                                                       |
|      | 121286832 | 121305444 | 0           | 3    |   | 54,149,579, 0,16957,18062                             |
| chr3 | 121286806 | 121305447 | ARGFX_D3_02 | 1000 | + |                                                       |
|      | 121286832 | 121305444 | 0           | 4    |   | 54,129,149,579, 0,2728,16957,18062                    |
| chr3 | 121286806 | 121305447 | ARGFX_D3_03 | 1000 | + |                                                       |
|      | 121286832 | 121289610 | 0           | 6    |   | 54,115,117,117,149,579, 0,2742,8824,12019,16957,18062 |
| chr3 | 121286806 | 121305447 | ARGFX_D3_04 | 1000 | + |                                                       |
|      | 121286832 | 121289610 | 0           | 5    |   | 54,115,117,149,579, 0,2742,8824,16957,18062           |
| chr3 | 121286806 | 121305447 | ARGFX_D3_05 | 1000 | + |                                                       |
|      | 121286832 | 121289610 | 0           | 4    |   | 54,115,117,579, 0,2742,8824,18062                     |
| chr3 | 121286806 | 121305447 | ARGFX_D3_06 | 1000 | + |                                                       |
|      | 121286832 | 121289610 | 0           | 5    |   | 54,115,117,149,579, 0,2742,12019,16975,18062          |

#### CPHX1

track name="CPHX1" description="CPHX1 clone and the potential ORF in human preimplantation development" visibility=2 itemRgb="On" colorByStrand="0,128,255 255,128,0"

|       |          |          |             |      |   |                                    |
|-------|----------|----------|-------------|------|---|------------------------------------|
| chr16 | 75748028 | 75760388 | CPHX1_D3_01 | 1000 | - |                                    |
|       | 75748124 | 75760340 | 0           | 4    |   | 1092,194,43,29, 0,4134,12287,12331 |

#### CPHX2

track name="CPHX2" description="CPHX2 clones and the potential ORF in human preimplantation development" visibility=2 itemRgb="On" colorByStrand="0,128,255 255,128,0"



|       |          |          |             |      |                                     |
|-------|----------|----------|-------------|------|-------------------------------------|
| chr16 | 75694124 | 75710907 | CPHX2_D3_01 | 1000 | -                                   |
|       | 75694154 | 75710897 | 0           | 4    | 821,202,194,23,<br>0,821,9136,16760 |
| chr16 | 75694124 | 75710907 | CPHX2_D3_02 | 1000 | -                                   |
|       | 75694776 | 75710897 | 0           | 3    | 916,194,23, 0,9136,16760            |
| chr16 | 75694124 | 75710907 | CPHX2_D3_03 | 1000 | -                                   |
|       | 75694154 | 75694966 | 0           | 2    | 1023,23, 0,16760                    |

### DPRX

track name="DPRX" description="DPRX clone and the potential ORF in human preimplantation development" visibility=2 itemRgb="On" colorByStrand="0,128,255 255,128,0"

|       |          |          |            |      |                         |
|-------|----------|----------|------------|------|-------------------------|
| chr19 | 54135319 | 54140277 | DPRX-D3_01 | 1000 | +                       |
|       | 54135360 | 54140239 | 0          | 3    | 69,155,428, 0,2465,4530 |
| chr19 | 54135319 | 54140277 | DPRX-D3_02 | 1000 | +                       |
|       | 54135360 | 54140091 | 0          | 2    | 69,428<br>0,4530        |

### DUXA

track name="DUXA" description="DUXA clone and the potential ORF in human preimplantation development" visibility=2 itemRgb="On" colorByStrand="0,128,255 255,128,0"

|       |          |          |            |      |                                                       |
|-------|----------|----------|------------|------|-------------------------------------------------------|
| chr19 | 57665723 | 57678838 | DUXA_D3_01 | 1000 | -                                                     |
|       | 57665779 | 57678808 | 0          | 6    | 127,106,146,112,155,52,<br>0,911,3972,4811,6287,13063 |

### DUXB

track name="DUXB" description="DUXB clones and the potential ORF in human preimplantation development" visibility=2 itemRgb="On" colorByStrand="0,128,255 255,128,0"

|       |          |          |            |      |                                              |
|-------|----------|----------|------------|------|----------------------------------------------|
| chr16 | 75727792 | 75735357 | DUXB_D3_01 | 1000 | -                                            |
|       | 75727829 | 75735316 | 0          | 5    | 631,155,106,155,66,<br>0,2066,2943,6120,7499 |

|       |          |          |            |      |                  |
|-------|----------|----------|------------|------|------------------|
| chr16 | 75727792 | 75735357 | DUXB_D3_02 | 1000 | -                |
|       | 75727829 | 75728423 | 0          | 4    | 631,155,106,66,  |
|       |          |          |            |      | 0,2066,2943,7499 |

|       |          |          |            |      |                         |
|-------|----------|----------|------------|------|-------------------------|
| chr16 | 75727792 | 75735357 | DUXB_D3_03 | 1000 | -                       |
|       | 75727829 | 75735316 |            | 0    | 3                       |
|       |          |          |            |      | 631,155,66, 0,2066,7499 |

## NOBOX

track name="NOBOX" description="NOBOX clone and the potential ORF in human preimplantation development" visibility=2 itemRgb="On" colorByStrand="0,128,255 255,128,0"

|      |           |           |             |      |                                 |
|------|-----------|-----------|-------------|------|---------------------------------|
| chr7 | 144094186 | 144100786 | NOBOX_D0_01 | 1000 | -                               |
|      | 144094335 | 144100783 | 0           | 7    | 448,305,229,86,107,107,37,      |
|      |           |           |             |      | 0,1188,1856,2303,2663,3112,6563 |

## TPRX2

track name="TPRX2" description="TPRX2 clones and the potential ORFs in human preimplantation development" visibility=2 itemRgb="On" colorByStrand="0,128,255 255,128,0"

|       |          |          |             |      |                        |
|-------|----------|----------|-------------|------|------------------------|
| chr19 | 48362491 | 48364978 | TPRX2_D3_01 | 1000 | +                      |
|       | 48362503 | 48364766 | 0           | 3    | 37,170,920, 0,878,1567 |

|       |          |          |             |      |                       |
|-------|----------|----------|-------------|------|-----------------------|
| chr19 | 48362491 | 48364978 | TPRX2_D3_02 | 1000 | +                     |
|       | 48362503 | 48364201 | 0           | 3    | 37,75,920, 0,973,1567 |

|       |          |          |             |      |                        |
|-------|----------|----------|-------------|------|------------------------|
| chr19 | 48362491 | 48364978 | TPRX2_D3_03 | 1000 | +                      |
|       | 48362503 | 48364818 | 0           | 3    | 37,170,316, 0,878,2171 |

## TPRX1

track name="TPRX1" description="TPRX1 clone and the potential ORF in human preimplantation development" visibility=2 itemRgb="On" colorByStrand="0,128,255 255,128,0"

|       |          |          |             |      |                       |
|-------|----------|----------|-------------|------|-----------------------|
| chr19 | 48304818 | 48307808 | TPRX1_D3_01 | 1000 | -                     |
|       | 48305031 | 48307796 | 0           | 5    | 662,277,129,170,37,   |
|       |          |          |             |      | 0,1010,1290,1942,2953 |

## Supplementary Table 1

| Gene         | Predicted promoters | Total number of normalized tagclusters in predicted transcript | Total number of normalized tagclusters in gene area |
|--------------|---------------------|----------------------------------------------------------------|-----------------------------------------------------|
| <i>ARGFX</i> | 0                   | 0                                                              | 1,07                                                |
| <i>DUXA</i>  | 0                   | 0,8                                                            | 0,8                                                 |
| <i>DPRX</i>  | 0                   | 0                                                              | 0                                                   |
| <i>NOBOX</i> | 0                   | 0                                                              | 0,37                                                |
| <i>CPHX1</i> | 0                   | 2,59                                                           | 2,59                                                |
| <i>CPHX2</i> | 0                   | 0                                                              | 0                                                   |
| <i>DUXB</i>  | 1                   | 35,94                                                          | 35,94                                               |
| <i>TPRX2</i> | 0                   | 0                                                              | 0                                                   |
| <i>OTX2</i>  | 22                  | > 10 000                                                       | > 10 000                                            |

## Supplementary Table 4

| Gene         | Forward Primer          | Reverse Primer           |
|--------------|-------------------------|--------------------------|
| <i>ARGFX</i> | GCCAGACCATGTTCCCAGAT    | TTTGAATCGCCGGTTCCTGA     |
| <i>CPHX1</i> | TCTCAGTTGCTTGCTGGTCTC   | GGAAACCACCTGAAGTGCCG     |
| <i>CPHX2</i> | GAGTTTCGACATGTCTTCCCAAG | GGTGAAATCAGGATAACCGTTCTC |
| <i>DPRX</i>  | GAAGATGCCAGGCTCAGAGG    | AAGGCTGGGGTTTGGGTATG     |
| <i>DUXA</i>  | GGGCAAGATCAACCTGGTGT    | TGTGTAAGTGAAGGGCGCTG     |
| <i>DUXB</i>  | GGCCAAAGAAATTGGGGTTCC   | GAGTCAGATGCTGGGACTGG     |
| <i>GAPDH</i> | GAGTCAACGGATTTGGTCTG    | CATGGGTGGAATCATATTGG     |

## Supplementary Table 5

| Gene           | Forward Primer with <i>Ascl</i> site   | Reverse Primer with <i>PACI</i> site          |
|----------------|----------------------------------------|-----------------------------------------------|
| <i>ARGFX</i>   | atatatGGCGCGCCATGAGGAACAGAATGGCCC      | cgcgcgTAAATTAATCAGAGAAATCCCAAGTCTACCATAT<br>T |
| <i>CPHX1</i>   | atatatGGCGCGCCATGAATTTGGACGGCAC        | cgcgcgTAAATTAATTAAGTTGCTGCATTTGG              |
| <i>CPHX2</i>   | atatatGGCGCGCCATGTCTTCCCAAGCTTTC       | cgcgcgTAAATTAATTAGCAATACTTTGCAAAGC            |
| <i>DPRX</i>    | atatatGGCGCGCCATGCCAGGCTCAGAGGATCT     | cgcgcgTAAATTAATCATCTCTCTCGACTTTGGTTAGAT       |
| <i>DUXA</i>    | atatatGGCGCGCCATGGCCGAAGACACCTATTC     | cgcgcgTAAATTAATCACCACGTTCTGGCTC               |
| <i>DUXB</i>    | atatatGGCGCGCCATGAATTTGGAGGGCACT       | cgcgcgTAAATTAATCAGTGTGTCCCTTTGAG              |
| <i>NOBOX</i>   | atatatGGCGCGCCATGGAACCCACAGAGAATC      | cgcgcgTAAATTAAGTGGGACATGGCTATTC               |
| <i>OTX2</i>    | atatatGGCGCGCCATGATGTCTTATCTTAAGCAACCG | cgcgcgTAAATTAATCAGAAACCTGGAATTTCCA            |
| <i>TPRX2</i>   | atatatGGCGCGCCATGCAAGACCTGGTCT         | cgcgcgTAAATTAATATAAATCCAGTAATGACCTG           |
| <i>mCherry</i> | atatatGGCGCGCCATGGTGAGCAAGGGCGAGGAGG   | cgcgcgTAAATTAATACTTGTACAGCTCGTCCATG           |

# Supplementary Figure 1

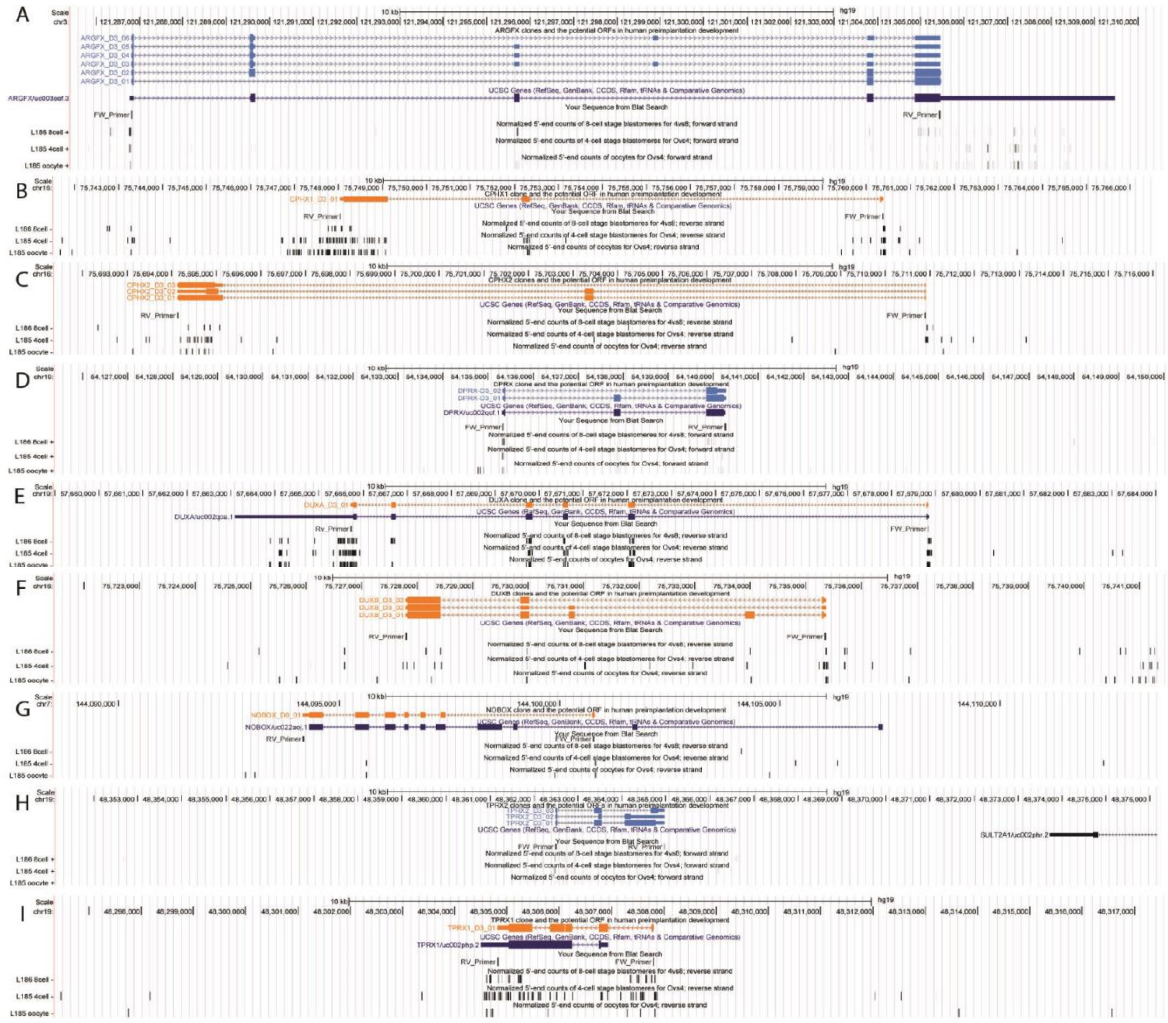

# Supplementary Figure 2

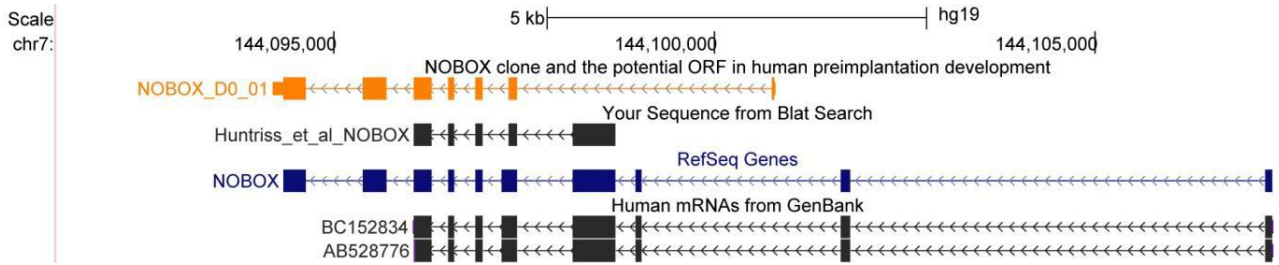

# Supplementary Figure 3

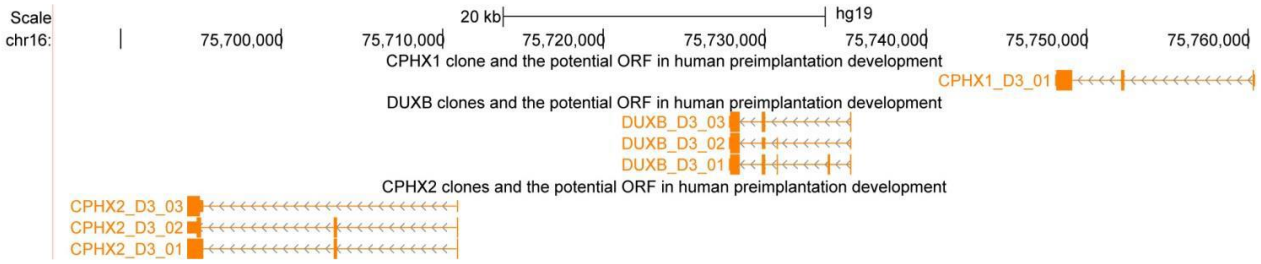

# Supplementary Figure 4

**a**

## CPHX1 vs. CPHX2

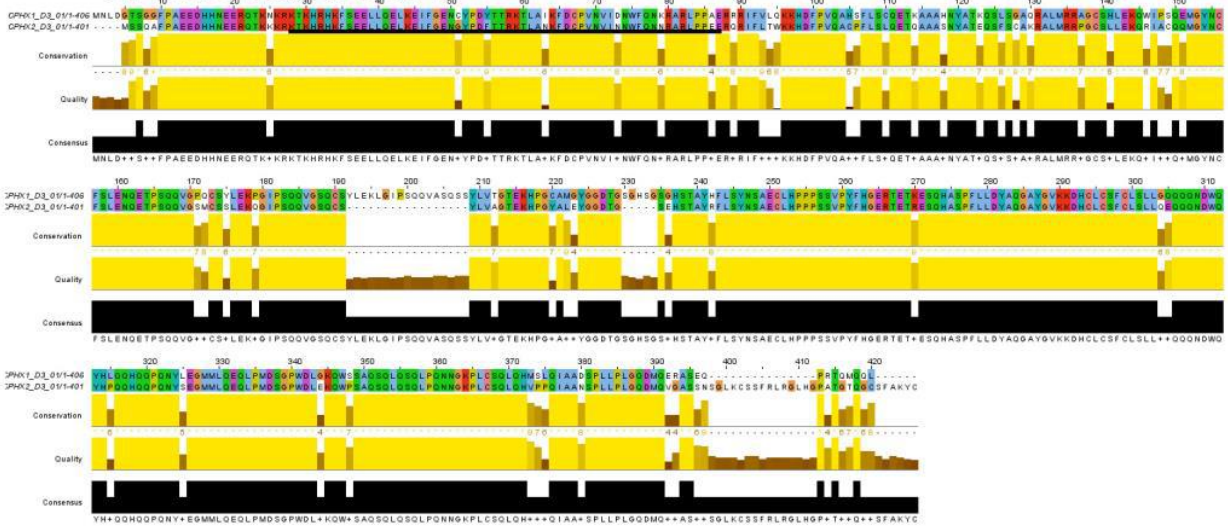

**b**

## TPRX1 vs. TPRX2

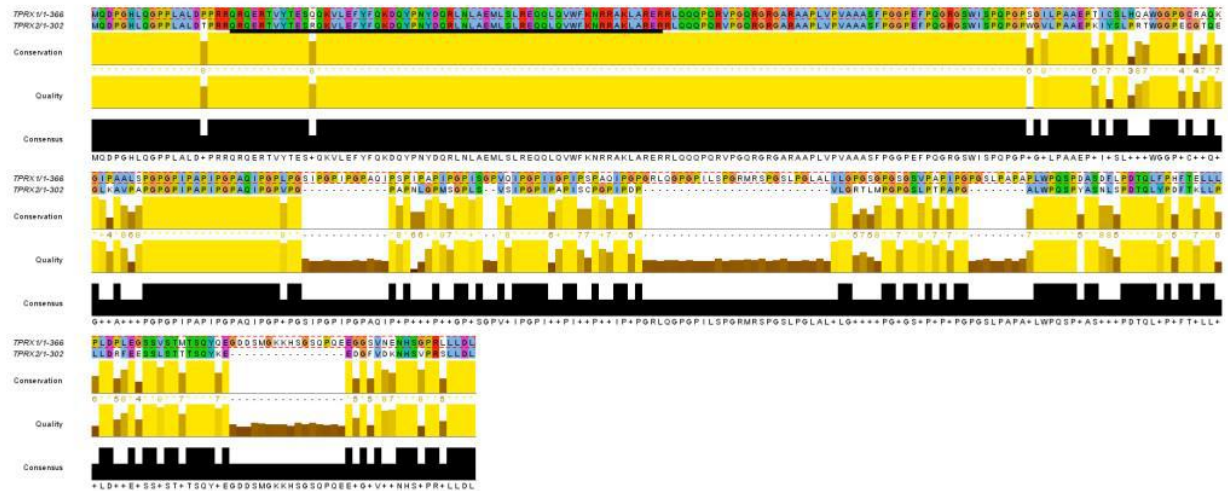

Supplementary Figure 5

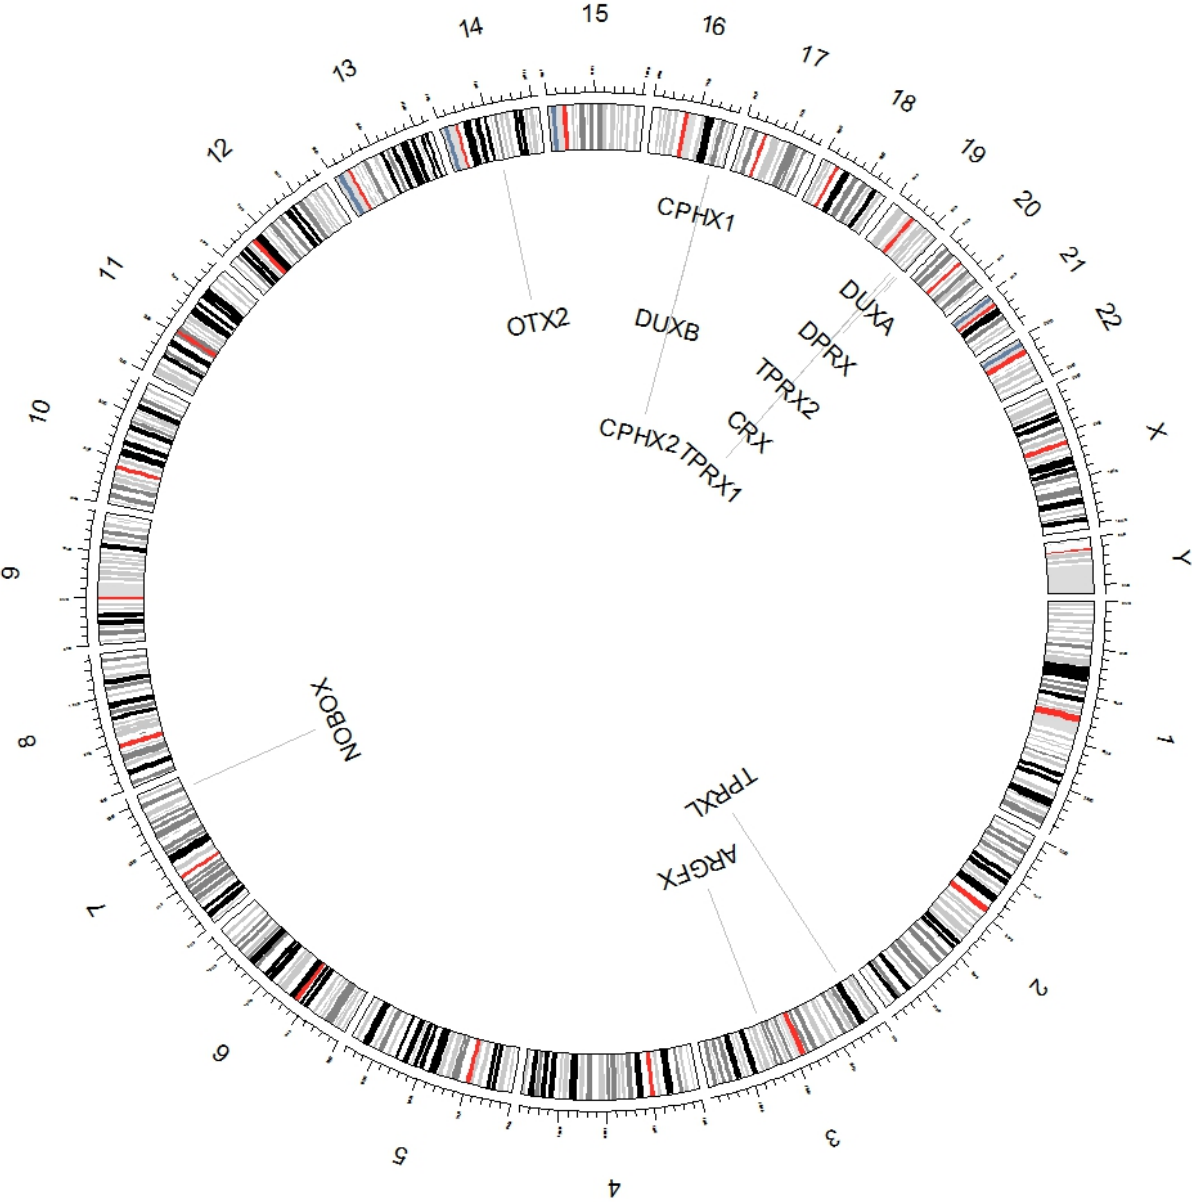

Supplementary Figure 6

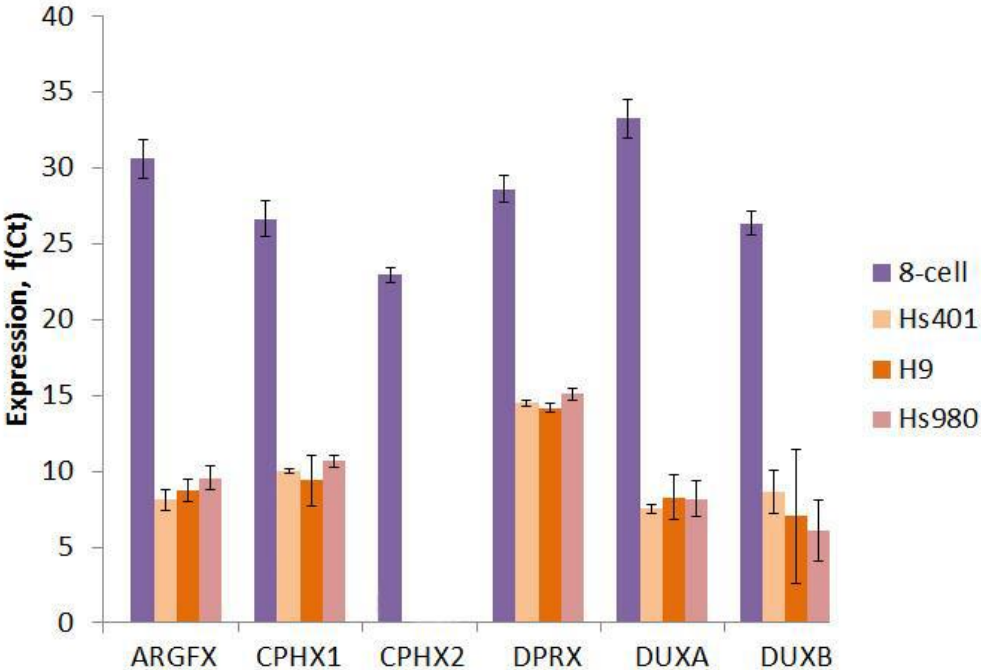





# Supplementary Figure 9

**a**

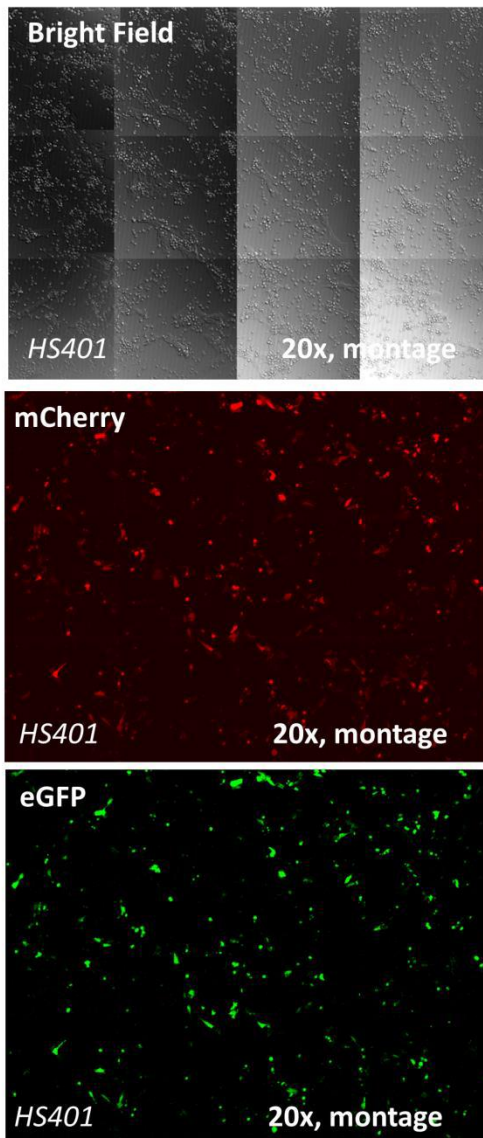

**b**

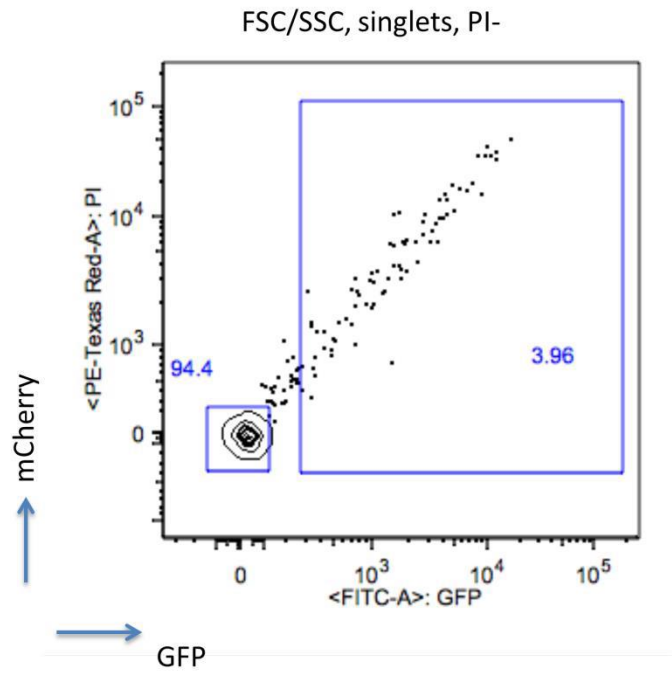

**c**

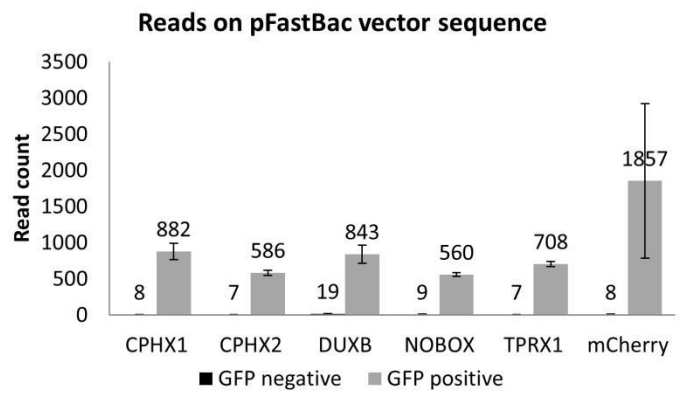

# Supplementary Figure 10

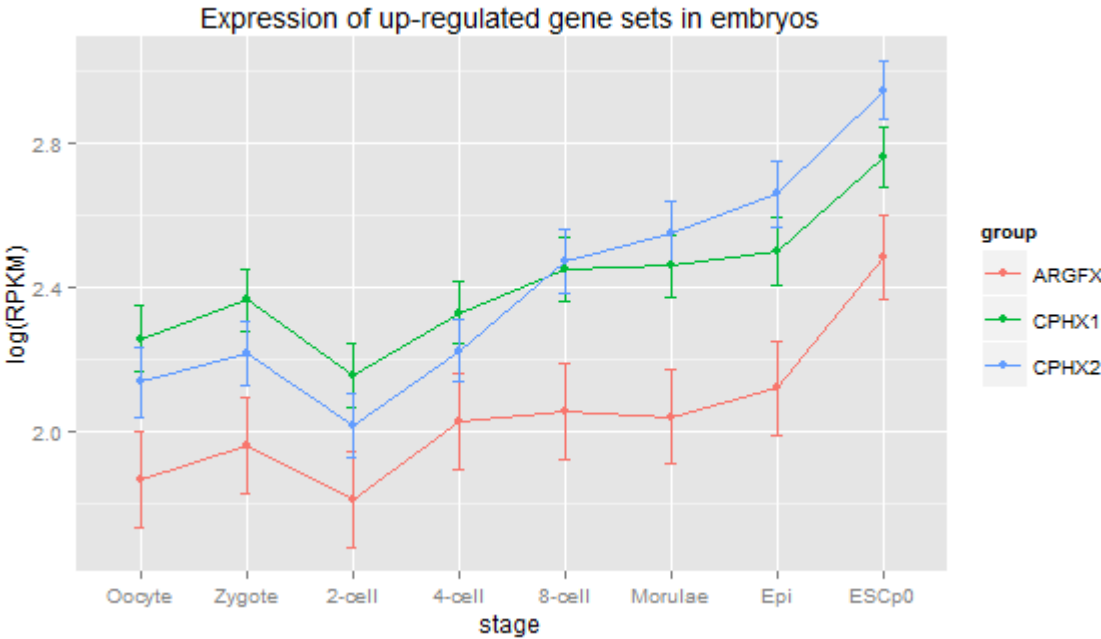

Supplementary Figure 11

## Common target genes

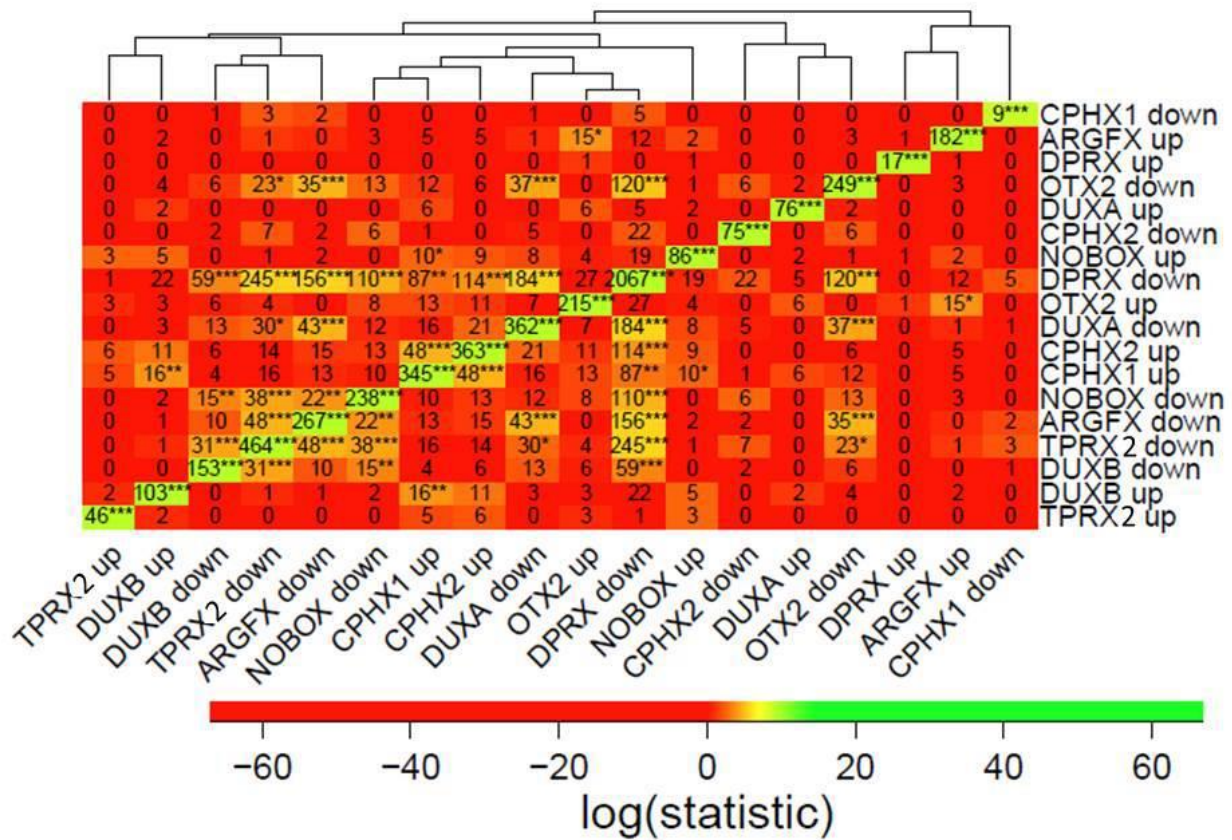

## Supplementary Figure 12

**a**

**Cluster dendrogram with AU/BP values (%)**

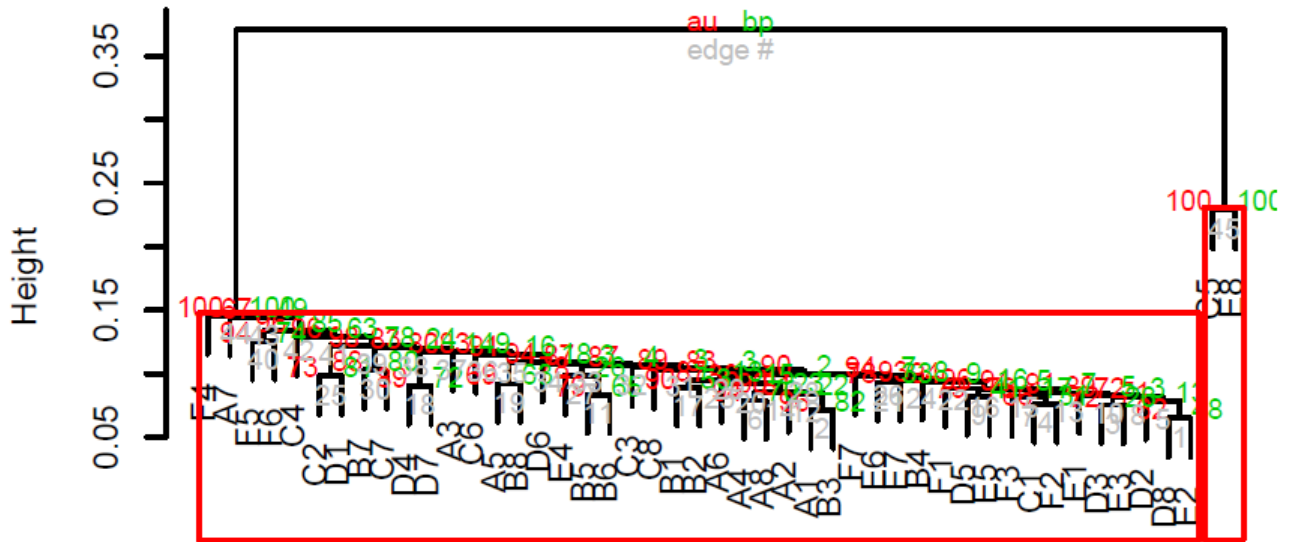

Distance: correlation, cluster method: average

**b**

**Cluster dendrogram with AU/BP values (%)**

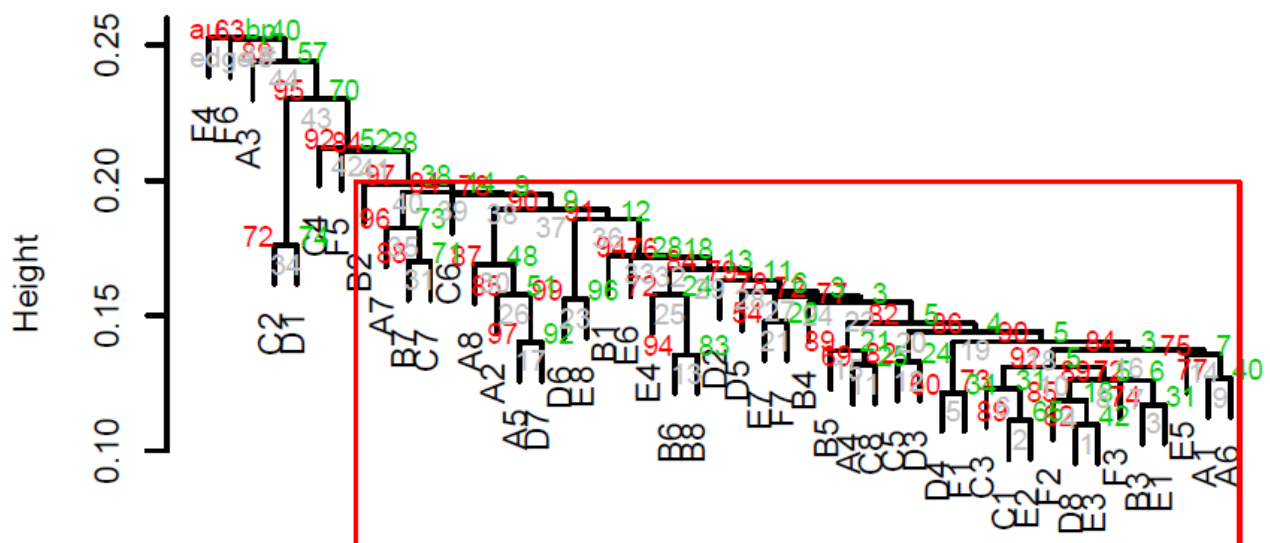

Distance: correlation, cluster method: average
